# Supplementary material
Source: publisher site journal article supplement (https://www.dovepress.com/article/477449)
Supplement: Supplementary file 1 [file get_supplementary_file.php]

**Supplementary Figure 1** Forest plot of causal effect estimates for gallstones on depressive symptoms, with all 37 valid IVs


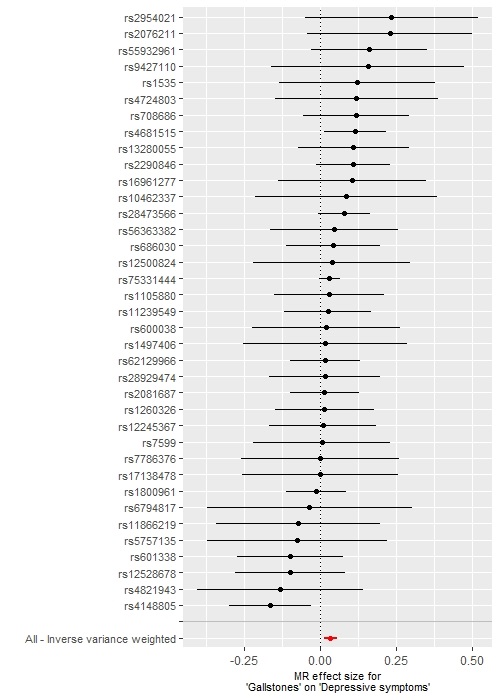


Abbreviations: IVs, instrumental variables. MR, Mendelian randomization.

**Supplementary Figure 2** Funnel plot of causal effect estimates for gallstones on depressive symptoms, with all 37 valid IVs


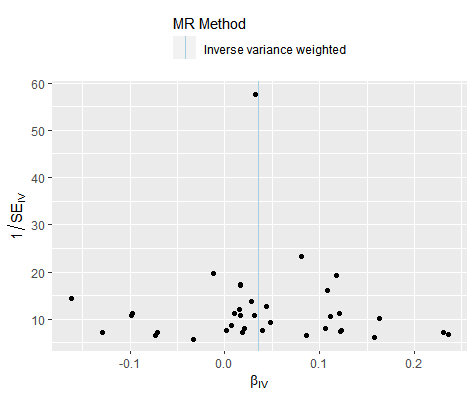


Abbreviations: IVs, instrumental variables. MR, Mendelian randomization.

| **Supplementary Table 1** The Patient Health Questionnaire-9(PHQ-9) Depression Screening Scale | | | | |
| --- | --- | --- | --- | --- |
| Over the last 2 weeks, how often have you been bothered by the following problems? | Not at all | Several days | More than half the days | Nearly every day |
| 1. little interest or pleasure in doing things | 0 | 1 | 2 | 3 |
| 1. feeling down, depressed, or hopeless | 0 | 1 | 2 | 3 |
| 1. trouble falling or staying asleep, or sleeping too much | 0 | 1 | 2 | 3 |
| 1. feeling tired or having little energy | 0 | 1 | 2 | 3 |
| 1. poor appetite or overeating | 0 | 1 | 2 | 3 |
| 1. feeling bad about yourself - or that you are a failure or have let yourself or your family down | 0 | 1 | 2 | 3 |
| 1. trouble concentrating on things, such as reading the newspaper or watching TV | 0 | 1 | 2 | 3 |
| 1. moving or speaking so slowly that other people could have noticed or the opposite - being so fidgety or restless that you have been moving around a lot more than usual | 0 | 1 | 2 | 3 |
|
| 1. thoughts that you would be better off dead or of hurting yourself in some way | 0 | 1 | 2 | 3 |

| **Supplementary Table 2** Details of GWAS datasets used for Mendelian randomization analyses | | | | | |
| --- | --- | --- | --- | --- | --- |
|  | Year | Population | Sample size | Number of SNPs | GWAS ID |
| Gallstones | 2021 | European | 487,553 | 24,173,391 | ebi-a-GCST90018819 |
| Depressive symptoms | 2022 | European | 47,517 | 8,281,749 | ieu-b-4840 |
| Diabetes | 2021 | European | 186,765 | 16,380,339 | finn-b-E4_DMNAS |
| Obesity | 2021 | European | 218,735 | 16,380,465 | finn-b-E4_OBESITY |

Abbreviations: GWAS, genome-wide association study. SNPs, single nucleotide polymorphisms.

**Supplementary Table 3** 49 SNPs associated with gallstones strongly

| **SNP** | **Chr** | **β** | **SE** | **EA** | **OA** | **EAF** | **Keep** | ***P*** | ***F*-statistic** |
| --- | --- | --- | --- | --- | --- | --- | --- | --- | --- |
| rs9427110 | 1 | 0.0512 | 0.0082 | A | G | 0.474145 | TRUE | 4.01E-10 | 38.99 |
| rs1497406 | 1 | 0.0487 | 0.0088 | G | A | 0.660774 | TRUE | 3.70E-08 | 30.63 |
| rs75331444 | 2 | 0.8073 | 0.0192 | A | G | 0.0535897 | TRUE | 1.00E-200 | 1767.94 |
| rs6544721 | 2 | -0.0637 | 0.0101 | C | G | 0.55953 | TRUE | 3.47E-10 | 39.78 |
| rs28473566 | 2 | -0.2047 | 0.0127 | A | G | 0.126437 | TRUE | 4.99E-58 | 259.79 |
| rs1105880 | 2 | 0.0726 | 0.0087 | G | A | 0.337404 | TRUE | 4.95E-17 | 69.64 |
| rs1260326 | 2 | 0.0819 | 0.0084 | C | T | 0.571145 | TRUE | 1.29E-22 | 95.06 |
| rs55726838 | 2 | -0.3894 | 0.0509 | A | G | 0.0104925 | TRUE | 1.90E-14 | 58.53 |
| rs13427681 | 2 | 0.0495 | 0.0084 | C | G | 0.594173 | TRUE | 3.20E-09 | 34.73 |
| rs55932961 | 2 | -0.0847 | 0.0103 | A | G | 0.19335 | TRUE | 2.39E-16 | 67.62 |
| rs4681515 | 3 | -0.1251 | 0.0082 | G | A | 0.525862 | TRUE | 8.53E-53 | 232.75 |
| rs6794817 | 3 | 0.0564 | 0.0103 | T | C | 0.234253 | TRUE | 4.90E-08 | 29.98 |
| rs10025454 | 4 | -0.0479 | 0.0085 | A | T | 0.356476 | TRUE | 1.70E-08 | 31.76 |
| rs12500824 | 4 | 0.0525 | 0.0084 | G | A | 0.614901 | TRUE | 4.70E-10 | 39.06 |
| rs2290846 | 4 | 0.1160 | 0.0092 | A | G | 0.278035 | TRUE | 1.41E-36 | 158.98 |
| rs10462337 | 5 | -0.0543 | 0.0098 | T | C | 0.223551 | TRUE | 3.40E-08 | 30.70 |
| rs351864 | 5 | -0.0657 | 0.0104 | G | C | 0.221206 | TRUE | 3.14E-10 | 39.91 |
| rs12528678 | 6 | 0.0824 | 0.0113 | T | G | 0.161989 | TRUE | 3.63E-13 | 53.17 |
| rs4148805 | 7 | -0.1386 | 0.0110 | A | G | 0.171712 | TRUE | 1.62E-36 | 158.76 |
| rs4724803 | 7 | 0.0551 | 0.0098 | G | A | 0.224992 | TRUE | 1.79E-08 | 31.61 |
| rs714583 | 7 | -0.0864 | 0.0091 | A | T | 0.299723 | TRUE | 1.43E-21 | 90.15 |
| rs7786376 | 7 | 0.0580 | 0.0101 | G | A | 0.22054 | TRUE | 9.79E-09 | 32.98 |
| rs13280055 | 8 | 0.1130 | 0.0148 | A | G | 0.12604 | TRUE | 2.36E-14 | 58.30 |
| rs2954021 | 8 | 0.0453 | 0.0082 | G | A | 0.523617 | TRUE | 2.82E-08 | 30.52 |
| rs2081687 | 8 | -0.1177 | 0.0090 | C | T | 0.698456 | TRUE | 5.88E-39 | 171.03 |
| rs12547281 | 8 | 0.0716 | 0.0115 | A | G | 0.15064 | TRUE | 3.97E-10 | 38.76 |
| rs686030 | 9 | 0.1158 | 0.0135 | A | C | 0.892994 | TRUE | 1.22E-17 | 73.58 |
| rs600038 | 9 | 0.0618 | 0.0097 | C | T | 0.228313 | TRUE | 1.78E-10 | 40.59 |
| rs11239549 | 10 | 0.1054 | 0.0102 | G | A | 0.206124 | TRUE | 7.08E-25 | 106.78 |
| rs12245367 | 10 | -0.0713 | 0.0083 | T | C | 0.435657 | TRUE | 8.37E-18 | 73.79 |
| rs1535 | 11 | 0.0511 | 0.0084 | G | A | 0.372807 | TRUE | 1.23E-09 | 37.01 |
| rs56363382 | 11 | 0.1141 | 0.0143 | T | C | 0.0894778 | TRUE | 1.57E-15 | 63.66 |
| rs7979473 | 12 | 0.0762 | 0.0083 | G | A | 0.584212 | TRUE | 5.53E-20 | 84.29 |
| rs16961277 | 13 | -0.0757 | 0.0125 | G | A | 0.119734 | TRUE | 1.46E-09 | 36.68 |
| rs28929474 | 14 | 0.3236 | 0.0346 | T | C | 0.0202004 | TRUE | 9.34E-21 | 87.47 |
| rs11644920 | 16 | 0.0682 | 0.0086 | T | A | 0.359809 | TRUE | 2.71E-15 | 62.89 |
| rs1558902 | 16 | 0.0528 | 0.0087 | A | T | 0.352201 | TRUE | 1.25E-09 | 36.83 |
| rs11866219 | 16 | -0.0478 | 0.0085 | C | A | 0.532705 | TRUE | 1.97E-08 | 31.62 |
| rs17138478 | 17 | 0.0760 | 0.0112 | A | C | 0.156238 | TRUE | 1.27E-11 | 46.05 |
| rs369298568 | 18 | -0.0827 | 0.0146 | C | T | 0.122523 | TRUE | 1.57E-08 | 32.09 |
| rs62129966 | 19 | -0.1553 | 0.0132 | A | C | 0.160946 | TRUE | 5.05E-32 | 138.42 |
| rs7599 | 19 | -0.06 | 0.0088 | G | A | 0.677314 | TRUE | 8.39E-12 | 46.49 |
| rs708686 | 19 | 0.0839 | 0.0089 | T | C | 0.307965 | TRUE | 5.44E-21 | 88.87 |
| rs601338 | 19 | 0.077 | 0.0097 | A | G | 0.473667 | TRUE | 2.16E-15 | 63.01 |
| rs1800961 | 20 | 0.3186 | 0.0246 | T | C | 0.0284869 | TRUE | 2.09E-38 | 167.73 |
| rs1321940 | 20 | -0.0483 | 0.0084 | G | A | 0.612712 | TRUE | 8.87E-09 | 33.06 |
| rs5757135 | 22 | 0.0464 | 0.0084 | T | C | 0.411284 | TRUE | 3.77E-08 | 30.51 |
| rs4821943 | 22 | 0.048 | 0.0084 | G | A | 0.387024 | TRUE | 1.10E-08 | 32.65 |
| rs2076211 | 22 | -0.0616 | 0.0099 | T | C | 0.242035 | TRUE | 4.27E-10 | 38.72 |
| Abbreviations: SNPs, single-nucleotide polymorphisms. Chr, chromosome. SE, standard error. EA, effect allele. OA, other allele. EAF, effect allele frequency. | | | | | | | | | |

**Supplementary Table 4** 37 SNPs used as valid instrumental variables for gallstones on depressive symptoms

| **SNP** | **Chr** | **EA** | **OA** | **Exposure** | **Outcome** | **β (exposure)** | **SE (exposure)** | ***P* (exposure)** | ***F*-statistic** |
| --- | --- | --- | --- | --- | --- | --- | --- | --- | --- |
| rs10462337 | 5 | T | C | Gallstones | Depressive symptoms | -0.0543 | 0.0098 | 3.40E-08 | 30.70 |
| rs1105880 | 2 | G | A | Gallstones | Depressive symptoms | 0.0726 | 0.0087 | 4.95E-17 | 69.64 |
| rs11239549 | 10 | G | A | Gallstones | Depressive symptoms | 0.1054 | 0.0102 | 7.08E-25 | 106.78 |
| rs11866219 | 16 | C | A | Gallstones | Depressive symptoms | -0.0478 | 0.0085 | 1.97E-08 | 31.62 |
| rs12245367 | 10 | T | C | Gallstones | Depressive symptoms | -0.0713 | 0.0083 | 8.37E-18 | 73.79 |
| rs12500824 | 4 | G | A | Gallstones | Depressive symptoms | 0.0525 | 0.0084 | 4.70E-10 | 39.06 |
| rs12528678 | 6 | T | G | Gallstones | Depressive symptoms | 0.0824 | 0.0113 | 3.63E-13 | 53.17 |
| rs1260326 | 2 | C | T | Gallstones | Depressive symptoms | 0.0819 | 0.0084 | 1.29E-22 | 95.06 |
| rs13280055 | 8 | A | G | Gallstones | Depressive symptoms | 0.1130 | 0.0148 | 2.36E-14 | 58.30 |
| rs1497406 | 1 | G | A | Gallstones | Depressive symptoms | 0.0487 | 0.0088 | 3.70E-08 | 30.63 |
| rs1535 | 11 | G | A | Gallstones | Depressive symptoms | 0.0511 | 0.0084 | 1.23E-09 | 37.01 |
| rs16961277 | 13 | G | A | Gallstones | Depressive symptoms | -0.0757 | 0.0125 | 1.46E-09 | 36.68 |
| rs17138478 | 17 | A | C | Gallstones | Depressive symptoms | 0.0760 | 0.0112 | 1.27E-11 | 46.05 |
| rs1800961 | 20 | T | C | Gallstones | Depressive symptoms | 0.3186 | 0.0246 | 2.09E-38 | 167.73 |
| rs2076211 | 22 | T | C | Gallstones | Depressive symptoms | -0.0616 | 0.0099 | 4.27E-10 | 38.72 |
| rs2081687 | 8 | C | T | Gallstones | Depressive symptoms | -0.1177 | 0.009 | 5.88E-39 | 171.03 |
| rs2290846 | 4 | A | G | Gallstones | Depressive symptoms | 0.1160 | 0.0092 | 1.41E-36 | 158.98 |
| rs28473566 | 2 | A | G | Gallstones | Depressive symptoms | -0.2047 | 0.0127 | 4.99E-58 | 259.79 |
| rs28929474 | 14 | T | C | Gallstones | Depressive symptoms | 0.3236 | 0.0346 | 9.34E-21 | 87.47 |
| rs2954021 | 8 | G | A | Gallstones | Depressive symptoms | 0.0453 | 0.0082 | 2.82E-08 | 30.52 |
| rs4148805 | 7 | A | G | Gallstones | Depressive symptoms | -0.1386 | 0.0110 | 1.62E-36 | 158.76 |
| rs4681515 | 3 | G | A | Gallstones | Depressive symptoms | -0.1251 | 0.0082 | 8.53E-53 | 232.75 |
| rs4724803 | 7 | G | A | Gallstones | Depressive symptoms | 0.0551 | 0.0098 | 1.79E-08 | 31.61 |
| rs4821943 | 22 | G | A | Gallstones | Depressive symptoms | 0.0480 | 0.0084 | 1.10E-08 | 32.65 |
| rs55932961 | 2 | A | G | Gallstones | Depressive symptoms | -0.0847 | 0.0103 | 2.39E-16 | 67.62 |
| rs56363382 | 11 | T | C | Gallstones | Depressive symptoms | 0.1141 | 0.0143 | 1.57E-15 | 63.66 |
| rs5757135 | 22 | T | C | Gallstones | Depressive symptoms | 0.0464 | 0.0084 | 3.77E-08 | 30.51 |
| rs600038 | 9 | C | T | Gallstones | Depressive symptoms | 0.0618 | 0.0097 | 1.78E-10 | 40.59 |
| rs601338 | 19 | A | G | Gallstones | Depressive symptoms | 0.0770 | 0.0097 | 2.16E-15 | 63.01 |
| rs62129966 | 19 | A | C | Gallstones | Depressive symptoms | -0.1553 | 0.0132 | 5.05E-32 | 138.42 |
| rs6794817 | 3 | T | C | Gallstones | Depressive symptoms | 0.0564 | 0.0103 | 4.90E-08 | 29.98 |
| rs686030 | 9 | A | C | Gallstones | Depressive symptoms | 0.1158 | 0.0135 | 1.22E-17 | 73.58 |
| rs708686 | 19 | T | C | Gallstones | Depressive symptoms | 0.0839 | 0.0089 | 5.44E-21 | 88.87 |
| rs75331444 | 2 | A | G | Gallstones | Depressive symptoms | 0.8073 | 0.0192 | 1.00E-200 | 1767.94 |
| rs7599 | 19 | G | A | Gallstones | Depressive symptoms | -0.0600 | 0.0088 | 8.39E-12 | 46.49 |
| rs7786376 | 7 | G | A | Gallstones | Depressive symptoms | 0.0580 | 0.0101 | 9.79E-09 | 32.98 |
| rs9427110 | 1 | A | G | Gallstones | Depressive symptoms | 0.0512 | 0.0082 | 4.01E-10 | 38.99 |
| Abbreviations: SNPs, single-nucleotide polymorphisms. Chr, chromosome. EA, effect allele. OA, other allele. SE, standard error. | | | | | | | | | |

| **Supplementary Table 5** Heterogeneity tests in bidirectional univariable Mendelian randomization analysis | | | | |
| --- | --- | --- | --- | --- |
| **Exposure** | **Outcome** | **Method** | **Cochran's *Q*** | ***P*** |
| Gallstones | Depressive symptoms | MR Egger | 30.58 | 0.68 |
| Inverse variance weighted | 30.67 | 0.72 |
| Depressive symptoms | Gallstones | MR Egger | 0.23 | 0.63 |
| Inverse variance weighted | 4.91 | 0.09 |

| **Supplementary Table 6** Pleiotropy tests in bidirectional univariable Mendelian randomization analysis | | | | |
| --- | --- | --- | --- | --- |
| **Exposure** | **Outcome** | **MR-Egger Intercept** | **SE** | ***P*** |
| Gallstones | Depressive symptoms | 0.001 | 0.002 | 0.77 |
| Depressive symptoms | Gallstones | 0.034 | 0.016 | 0.28 |
| Abbreviation:SE, standard error. | | | | |

| **Supplementary Table 7** 3 SNPs used as valid instrumental variables for depressive symptoms on gallstones | | | | | | | | | |
| --- | --- | --- | --- | --- | --- | --- | --- | --- | --- |
| **SNP** | **Chr** | **EA** | **OA** | **Exposure** | **Outcome** | **β (exposure)** | **SE (exposure)** | ***P* (exposure)** | ***F*-statistic** |
| rs116913507 | 11 | A | G | Depressive symptoms | Gallstones | -0.0811 | 0.0149 | 4.93E-08 | 29.63 |
| rs150031822 | 7 | T | TG | Depressive symptoms | Gallstones | 0.1131 | 0.0205 | 3.22E-08 | 30.44 |
| rs3913363 | 3 | T | C | Depressive symptoms | Gallstones | -0.0388 | 0.0068 | 1.01E-08 | 32.56 |
